# Supplementary material for: A simple route for preparation of highly stable CuO nanoparticles for nonenzymatic glucose detection
Source: Royal Society of Chemistry journal article supplement (doi:10.1039/c2cy00453d), 2012-01-01
Supplement: c2cy00453d.pdf [file c2cy00453d.pdf]

## Electronic Supplementary Information

### A simple route for preparation of well-stable CuO nanoparticles for enzymeless glucose detection

Sen Liu,<sup>a</sup> Jingqi Tian,<sup>a,b</sup> Lei Wang,<sup>a</sup> Xiaoyun Qin,<sup>a</sup> Yingwei Zhang,<sup>a</sup> Yonglan Luo,<sup>a</sup>

Abdullah M. Asiri,<sup>c,d</sup> Abdulrahman O. Al-Youbi<sup>c,d</sup> and Xuping Sun<sup>a,c,d\*</sup>

<sup>a</sup> State Key Lab of Electroanalytical Chemistry, Changchun Institute of Applied Chemistry, Chinese Academy of Sciences, Changchun 130022, Jilin, P. R. China

<sup>b</sup> Graduate School of the Chinese Academy of Sciences, Beijing 100039, China

<sup>c</sup> Chemistry Department, Faculty of Science, King Abdulaziz University, Jeddah 21589, Saudi Arabia

<sup>d</sup> Center of Excellence for Advanced Materials Research, King Abdulaziz University, Jeddah 21589, Saudi Arabia

\*To whom correspondence should be addressed. Tel/Fax: 0086-431-85262065.

E-mail: sunxp@ciac.jl.cn.

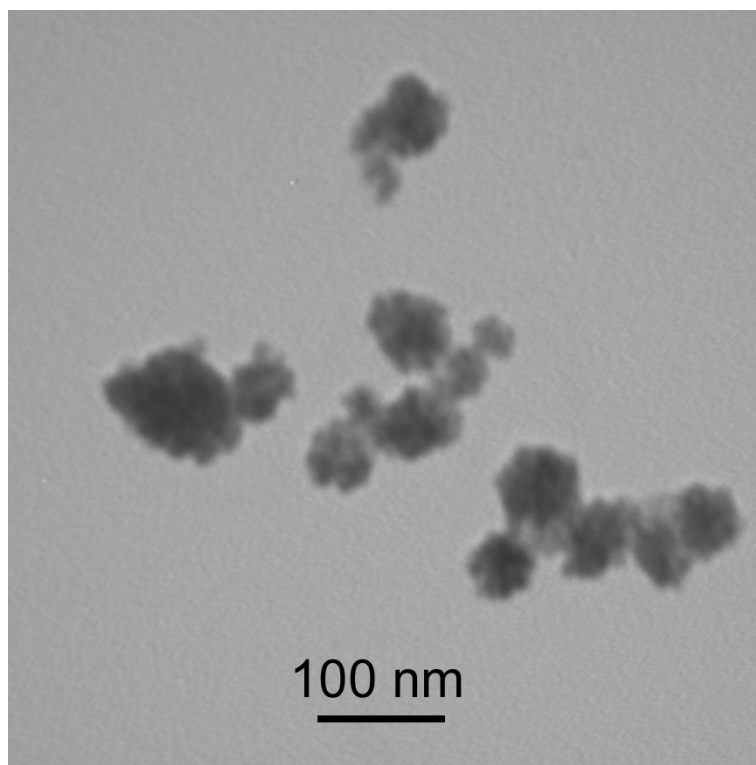

**Fig. S1** TEM image of CuO nanoparticles obtained by heating aqueous  $\text{Cu}(\text{OAc})_2$  and urea solution in the absence of PQ11.

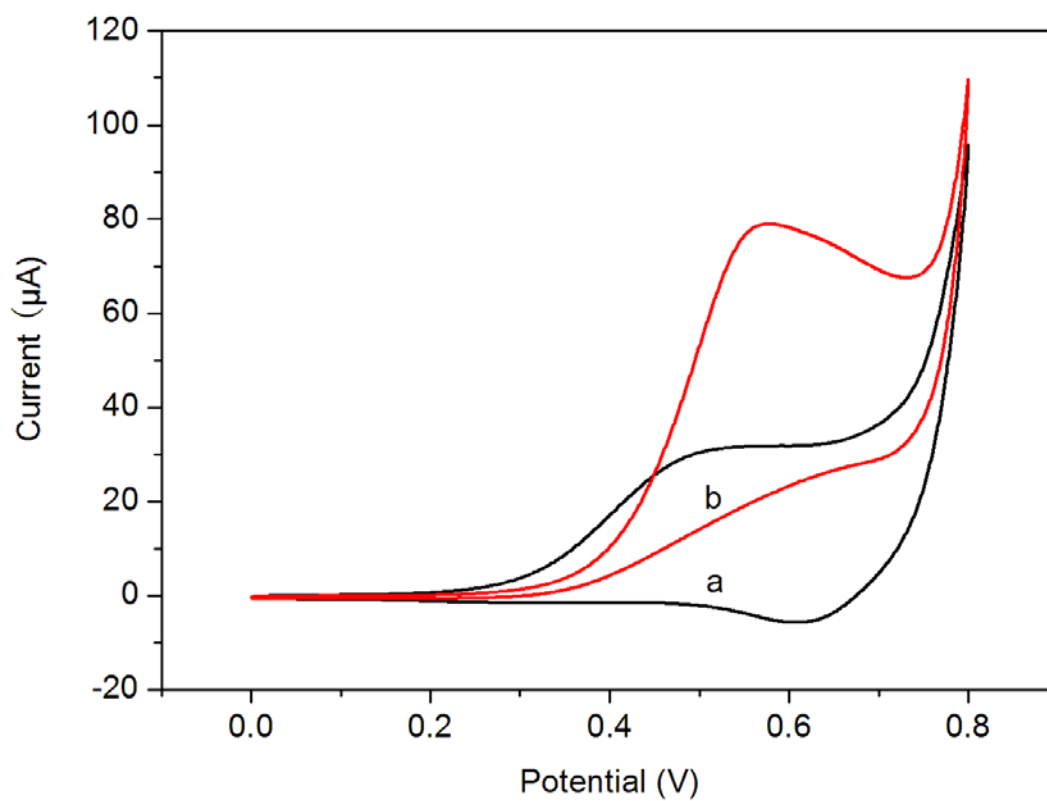

**Fig. S2** CVs of CuO nanoparticles modified GCE (a: obtained in the absence of PQ11, b: obtained in the presence of PQ11) in 0.1 M NaOH in the presence of 1 mM of glucose (scan rate: 0.02 V/s).

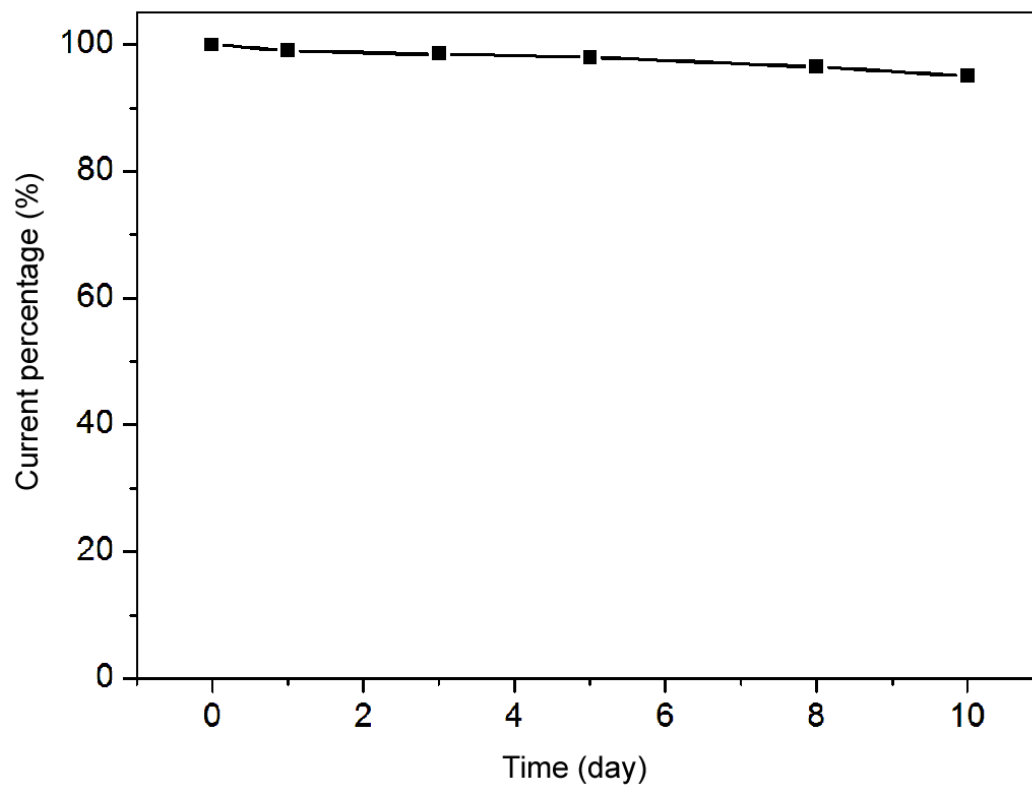

**Fig. S3** The variation in the response current of the CuO/GCE toward 100  $\mu$ M glucose in 0.1 M NaOH for 10 days (scan rate: 0.02 V/s).
